# Supplementary material for: Shotgun Metagenomic Sequencing Reveals Functional Genes and Microbiome Associated with Bovine Digital Dermatitis
Source: PubMed Central journal article supplement (PMC4508036; doi:10.1371/journal.pone.0133674), 2015-07-20
Supplement: pone.0133674.s005.pdf [file pone.0133674.s005.pdf]

Mean (95% Confidence Interval)

| Flagellum Proteins                           | HBS               | ADD               | IDD               | <i>p</i> -value |
|----------------------------------------------|-------------------|-------------------|-------------------|-----------------|
| Fla protein FlaA                             | 0                 | 0.508(0.67,0.35)  | 0.500(1.07,-0.07) | 0.0029          |
| RNA polymerase sigma factor RpoD             | 0.083(0.15,0.02)  | 0.401(0.59,0.22)  | 0.507(0.91,0.10)  | 0.0085          |
| Fla hook-associated protein FlgK             | 0                 | 0.411(0.57,0.25)  | 0.466(0.83,0.10)  | 0.0006          |
| Fla biosynthesis protein FlhA                | 0                 | 0.393(0.55,0.24)  | 0.462(0.88,0.04)  | 0.0015          |
| Fla motor switch protein FliG                | 0                 | 0.351(0.46,0.24)  | 0.405(0.91,-0.10) | 0.0084          |
| RNA polymerase sigma-54 factor RpoN          | 0                 | 0.427(0.56,0.30)  | 0.312(0.64,-0.02) | 0.0005          |
| Fla hook protein FlgE                        | 0                 | 0.288(0.37,0.21)  | 0.445(0.81,0.08)  | 0.0008          |
| Fla-specific ATP synthase FliI               | 0.018(0.05,-0.02) | 0.301(0.42,0.18)  | 0.406(0.91,-0.10) | 0.0202          |
| Fla M-ring protein FliF                      | 0                 | 0.309(0.45,0.17)  | 0.398(0.93,-0.03) | 0.0067          |
| Fla motor rotation protein MotA              | 0.018(0.05,-0.02) | 0.303(0.48,0.13)  | 0.378(0.83,-0.08) | 0.0218          |
| Fla motor switch protein FliM                | 0                 | 0.303(0.48,0.13)  | 0.348(0.78,-0.08) | 0.0144          |
| Fla biosynthesis protein FlhB                | 0                 | 0.305(0.53,0.08)  | 0.336(0.82,-0.04) | 0.0157          |
| Fla motor rotation protein MotB              | 0                 | 0.279(0.55,0.01)  | 0.359(0.78,-0.06) | 0.0346          |
| Fla basal-body rod protein FlgG              | 0                 | 0.307(0.43,0.18)  | 0.260(0.77,-0.25) | 0.0441          |
| Fla hook-associated protein FliD             | 0                 | 0.181(0.25,0.11)  | 0.381(0.62,0.14)  | 0.0002          |
| Fla hook-associated protein FlgL             | 0                 | 0.217(0.40,0.03)  | 0.330(0.70,-0.04) | 0.0216          |
| Fla biosynthesis protein FliP                | 0                 | 0.274(0.39,0.16)  | 0.269(0.60,-0.06) | 0.0069          |
| RNA polymerase sigma factor for fla operon   | 0                 | 0.213(0.36,0.07)  | 0.301(0.65,-0.05) | 0.0169          |
| Fla basal-body rod modification protein FlgD | 0.018(0.05,-0.02) | 0.223(0.40,0.05)  | 0.265(0.59,-0.06) | 0.0436          |
| Fla basal-body rod protein FlgF              | 0                 | 0.228(0.40,0.03)  | 0.266(0.66,-0.12) | 0.0499          |
| Fla motor switch protein FliN                | 0                 | 0.129(0.28,-0.02) | 0.333(0.74,-0.07) | 0.0334          |
| Fla assembly protein FliH                    | 0                 | 0.187(0.34,0.03)  | 0.273(0.61,-0.06) | 0.0298          |

|                                            |                   |                   |                   |        |
|--------------------------------------------|-------------------|-------------------|-------------------|--------|
| Fla basal-body rod protein FlgC            | 0                 | 0.187(0.41,-0.04) | 0.241(0.58,-0.10) | 0.0854 |
| Fla synthesis regulator FleN               | 0                 | 0.181(0.36,0.00)  | 0.245(0.59,-0.10) | 0.0628 |
| Fla biosynthesis protein FliR              | 0                 | 0.129(0.30,-0.04) | 0.253(0.62,-0.11) | 0.0870 |
| Fla biosynthesis protein FliS              | 0                 | 0.129(0.22,0.04)  | 0.208(0.49,-0.07) | 0.0357 |
| Fla hook-basal body complex protein FliE   | 0                 | 0.129(0.30,-0.04) | 0.160(0.35,-0.03) | 0.0819 |
| Fla protein FlbB                           | 0                 | 0.108(0.24,-0.03) | 0.173(0.51-0.17)  | 0.1874 |
| Fla basal-body rod protein FlgB            | 0                 | 0.166(0.21,0.12)  | 0.112(0.33,-0.11) | 0.0153 |
| Fla biosynthesis protein FliQ              | 0                 | 0.108(0.24,-0.03) | 0.153(0.45,-0.15) | 0.1856 |
| Fla protein FlbD                           | 0                 | 0.072(0.15,-0.01) | 0.160(0.35,-0.03) | 0.0346 |
| Fla hook-length control protein FliK       | 0.036(0.08,-0.01) | 0.057(0.17,-0.05) | 0.135(0.40,-0.13) | 0.5091 |
| Fla biosynthesis protein FlhF              | 0                 | 0.000             | 0.208(0.49,-0.07) | 0.0243 |
| Fla protein FlgJ [peptidoglycan hydrolase] | 0                 | 0.093(0.20,-0.02) | 0.096(0.19,0.00)  | 0.0514 |
| Fla protein FlaB                           | 0                 | 0.036(0.11,-0.03) | 0.153(0.45,-0.15) | 0.1827 |
| Fla P-ring protein FlgI                    | 0                 | 0.036(0.11,-0.03) | 0.124(0.37,-0.12) | 0.1968 |
| Fla protein FlaG                           | 0                 | 0.072(0.15,-0.01) | 0.048(0.14,-0.05) | 0.1122 |
| Flag regulatory protein FleQ               | 0                 | 0.036(0.11,-0.03) | 0.048(0.14,-0.05) | 0.2981 |
| Fla biosynthesis protein FliL              | 0                 | 0.072(0.15,-0.01) | 0                 | 0.0369 |
| Fla biosynthesis protein FliZ              | 0                 | 0.036(0.11,-0.03) | 0                 | 0.2692 |
| Fla protein FliJ                           | 0                 | 0.036(0.11,-0.03) | 0                 | 0.2692 |

---
